# Supplementary material for: Social Aspects of Hookah Smoking Among US Youth
Source: Oxford University Press journal article supplement (doi:10.1542/peds.2018-0341), 2018-07-02
Supplement: peds_20180341supplementarydata.pdf [file peds_20180341supplementarydata.pdf]

## Supplemental Information

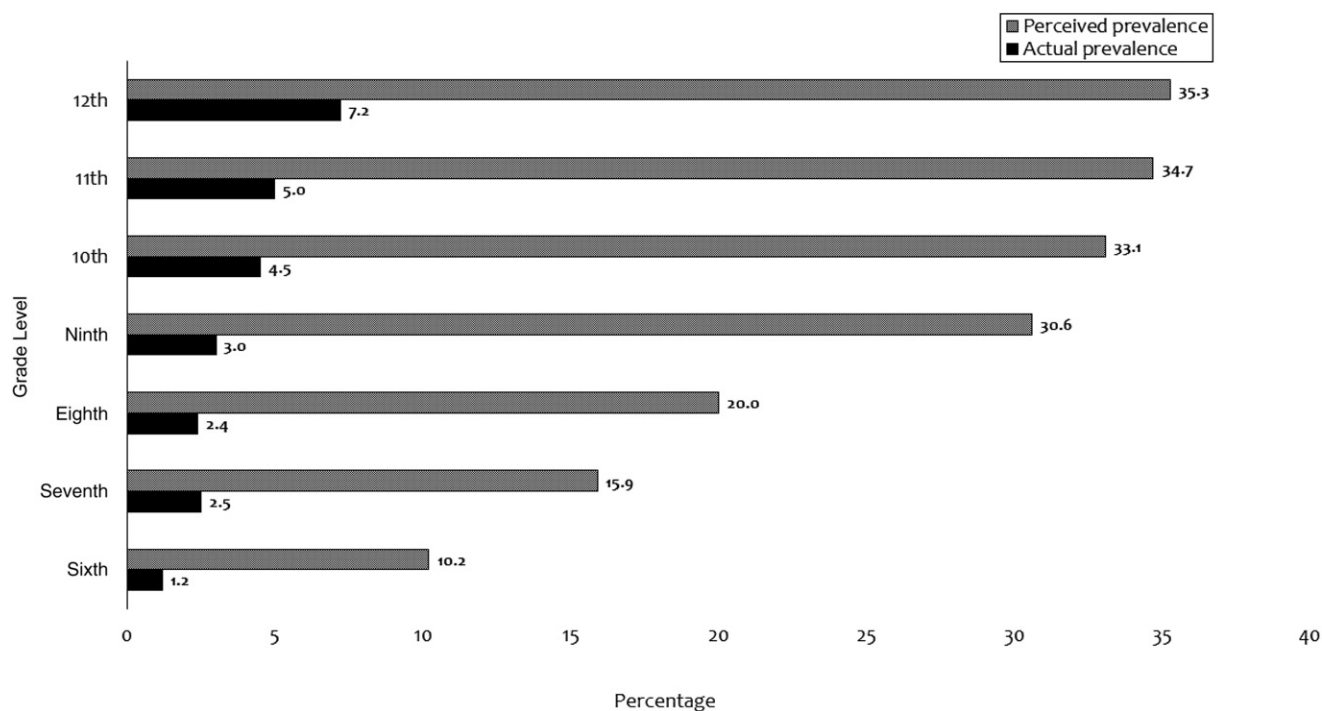

### SUPPLEMENTAL FIGURE 1

Actual and perceived prevalence of hookah smoking among US middle and high school students (NYTS 2016). <sup>a</sup> Actual prevalence is defined as smoking hookah on at least 1 day within the past 30 days (ie, dichotomized as 0 [nonuse within past 30 days] and 1 [use on  $\geq 1$  day]). The arithmetic means of the dichotomized responses produced the actual prevalence. <sup>b</sup> Perceived prevalence is assessed by asking students how many students out of 10 in their grade they thought smoked hookah; response options ranged from 0 to 10. The arithmetic means of the discrete responses produced the average perceived prevalence.
